# Supplementary material for: BLAST+: architecture and applications
Source: Springer Nature journal article supplement (doi:10.1186/1471-2105-10-421), 2009-12-01

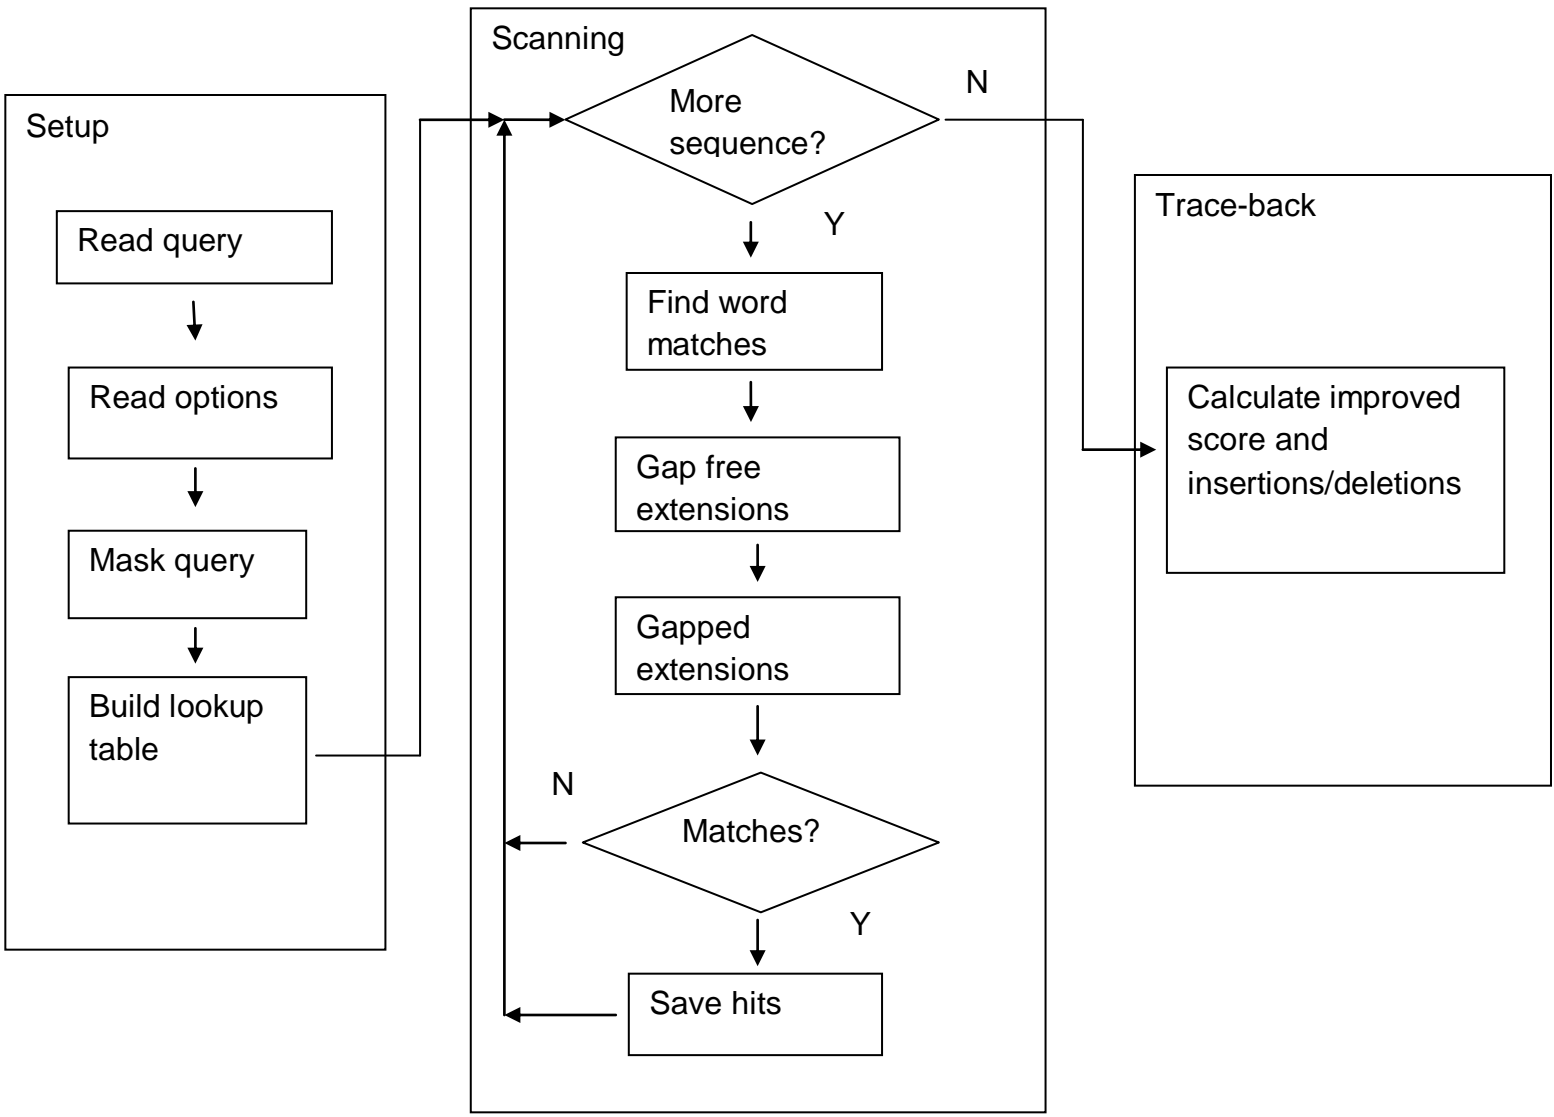

Supplement: 12859_2009_3151_MOESM2_ESM.pdf [file 12859_2009_3151_MOESM2_ESM.pdf]
