# Supplementary figures and images for: BLAST+: architecture and applications
Source: Springer Nature journal article supplement (doi:10.1186/1471-2105-10-421), 2009-12-01

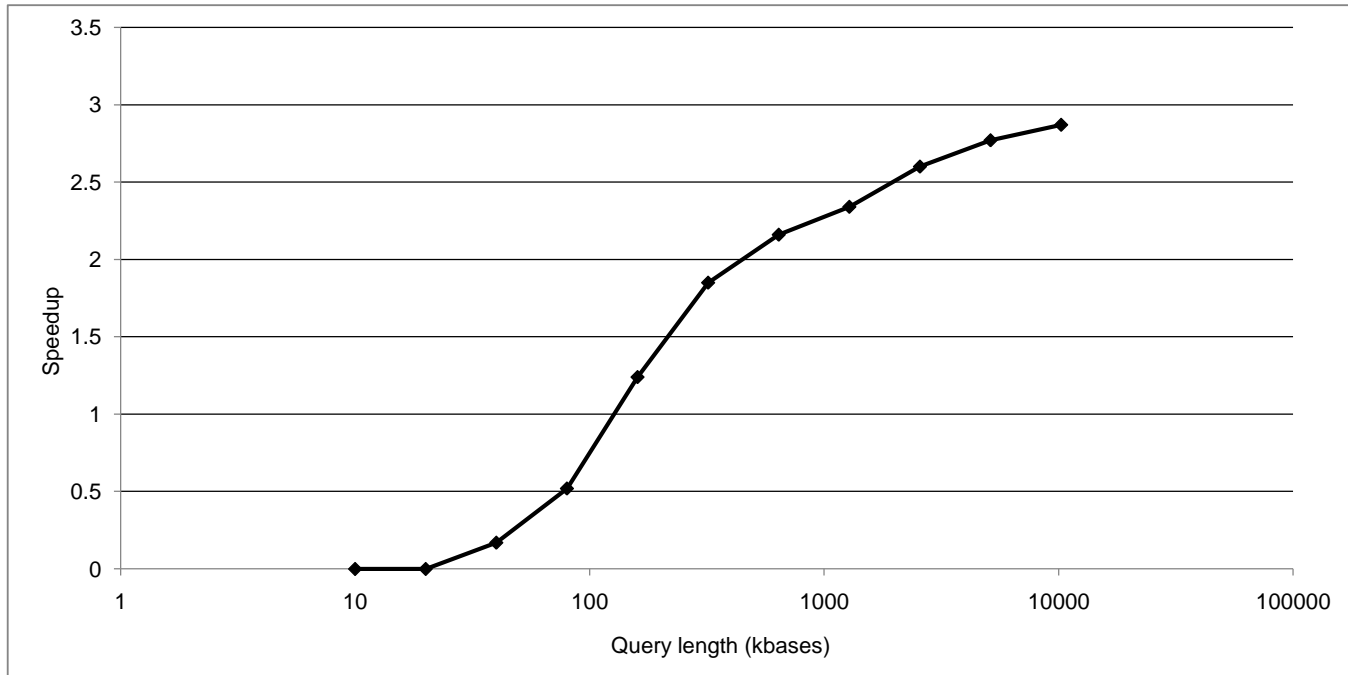

Supplement: 12859_2009_3151_MOESM3_ESM.pdf [file 12859_2009_3151_MOESM3_ESM.pdf]

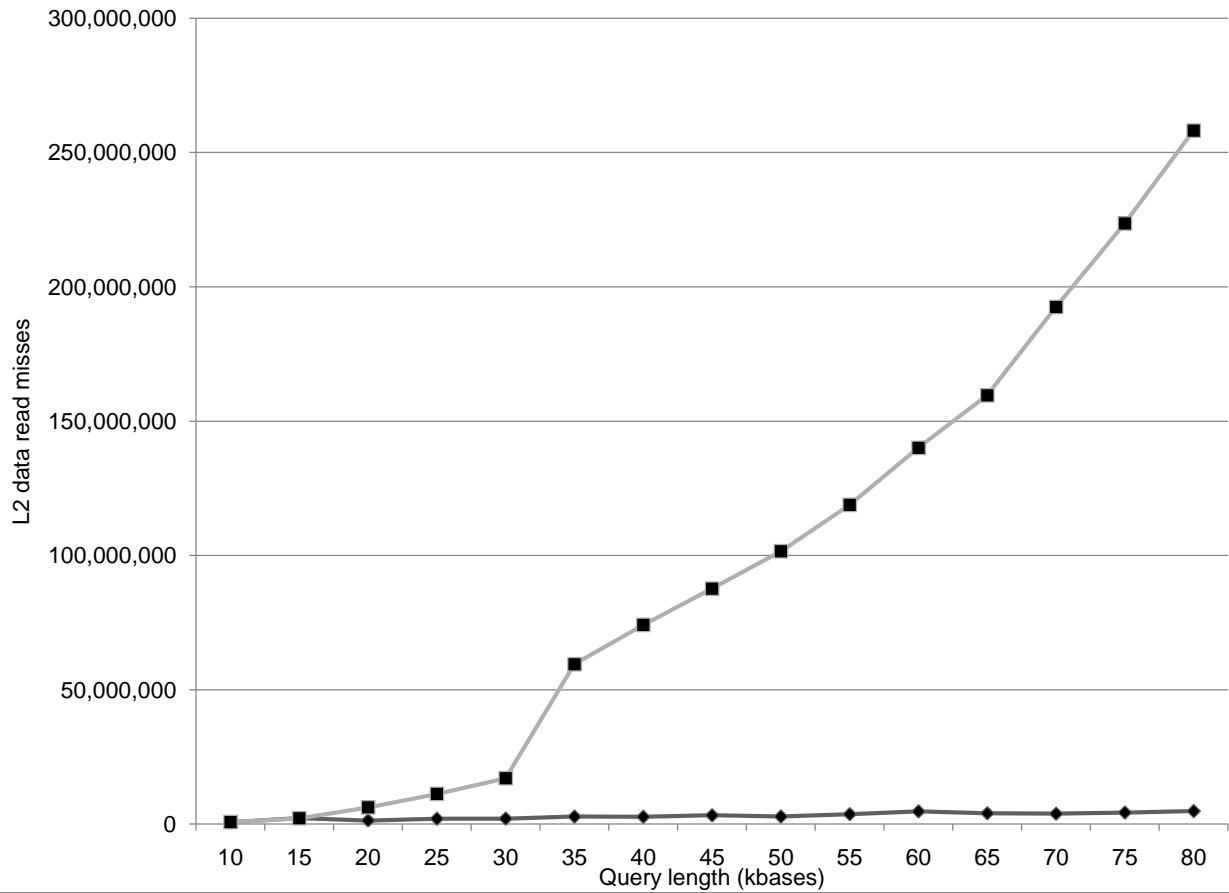

Supplement: 12859_2009_3151_MOESM4_ESM.pdf [file 12859_2009_3151_MOESM4_ESM.pdf]

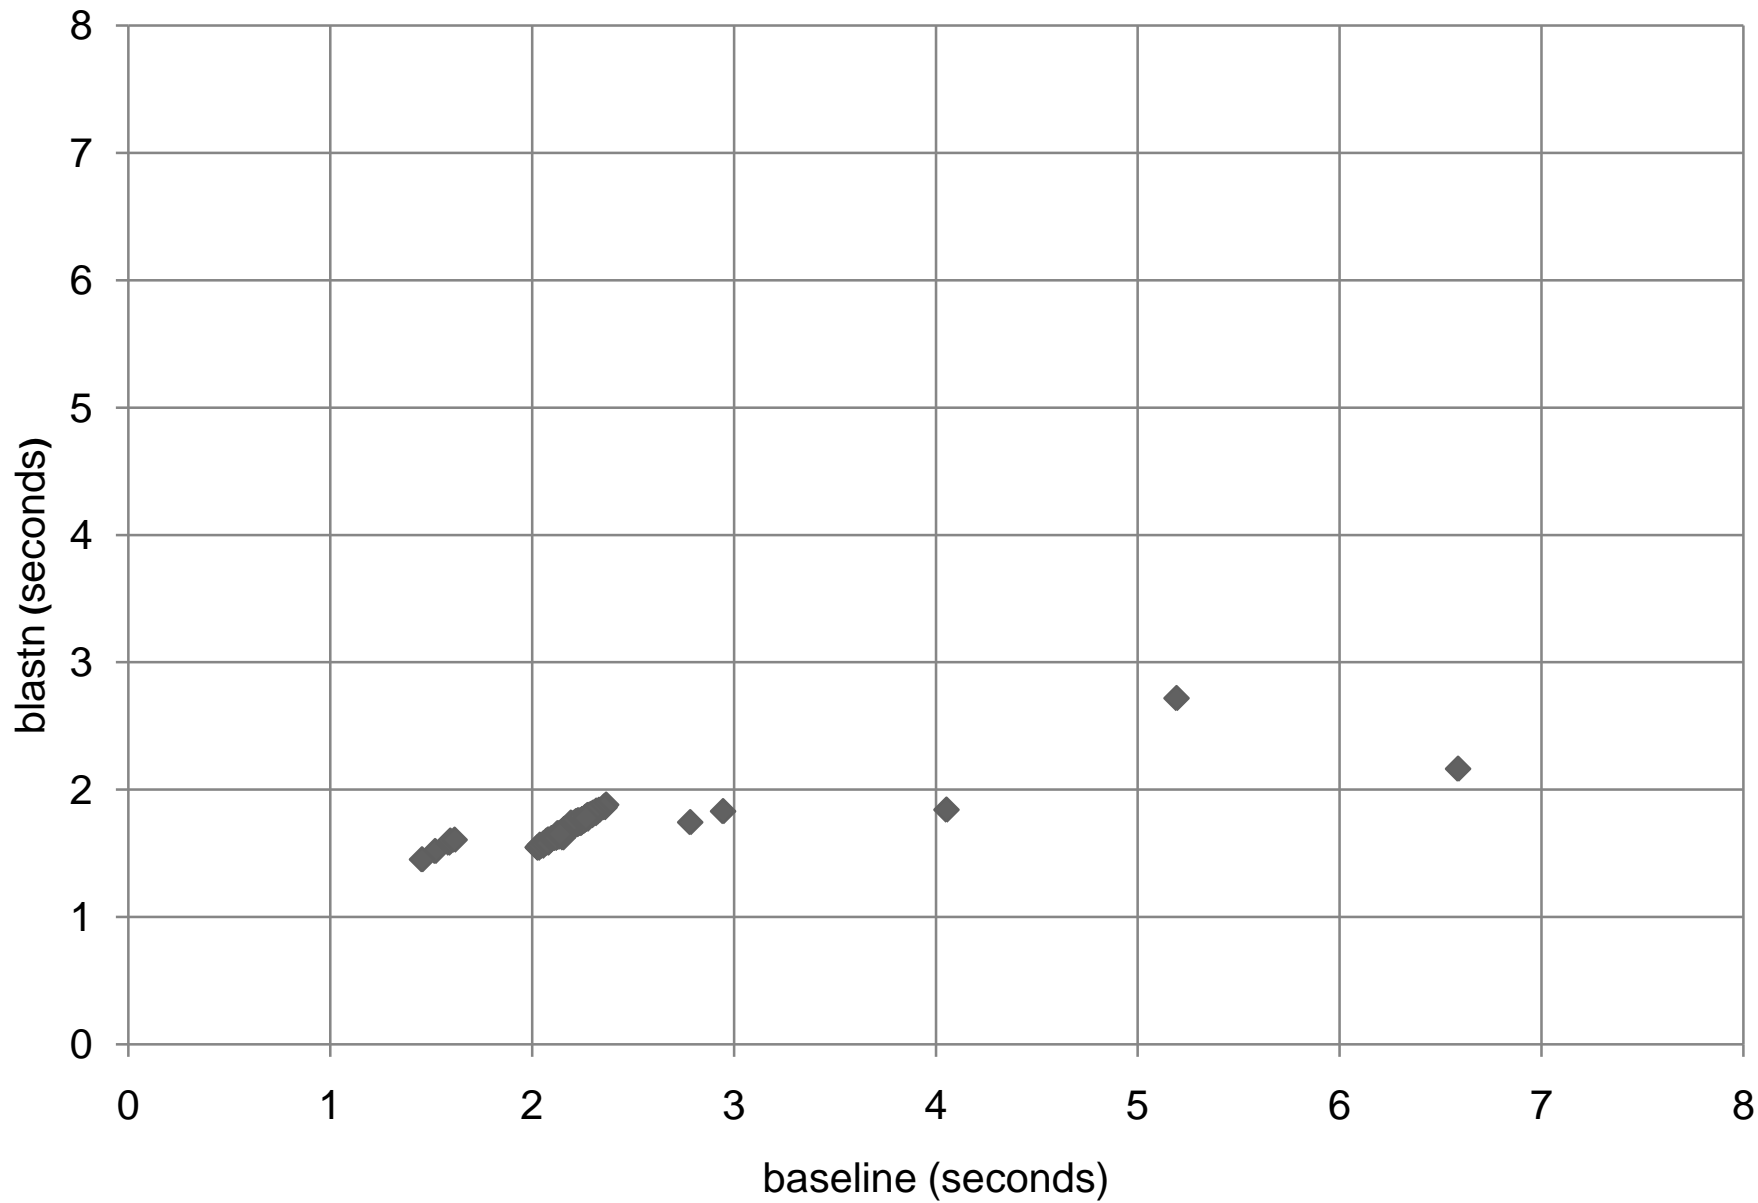

Supplement: 12859_2009_3151_MOESM5_ESM.pdf [file 12859_2009_3151_MOESM5_ESM.pdf]
